# Supplementary material for: Genomic alterations of ground-glass nodular lung adenocarcinoma
Source: PubMed Central journal article supplement (PMC5955945; doi:10.1038/s41598-018-25800-2), 2018-05-16

## **Genomic alterations of ground-glass nodular lung adenocarcinoma**

Hyun Lee<sup>1</sup>, Je-Gun Joung<sup>2</sup>, Hyun-Tae Shin<sup>2</sup>, Duk-Hwan Kim<sup>3</sup>, Yujin Kim<sup>3</sup>, Hojoong Kim<sup>1</sup>,  
O Jung Kwon<sup>1</sup>, Young Mog Shim<sup>4</sup>, Ho Yun Lee<sup>5</sup>, Kyung Soo Lee<sup>5</sup>, Yoon-La Choi<sup>6</sup>, Woong-  
Yang Park<sup>2</sup>, D. Neil Hayes<sup>7</sup>, Sang-Won Um<sup>1</sup>

## **Supplementary information**

**Supplementary Figure S1.** The proportions of solid and pure ground-glass opacity in GGN7. The proportions of solid and pure ground-glass opacity were determined using the tumor-shadow disappearance ratio on a computed tomography scan.

**Supplementary Figure S2.** The IGV visualization of fusion genes detected by RNA sequencing.

(a) MED13L → TDRD3 in GGN3, (b) SAMD12 → TAF2 in GGN4, (c) CEP350 → TOP2A and (d) TADA2A → MMP9 in GGN8, and (e) TMEM243 → DMTF1 in GGN9

**Supplementary Figure S3.** Validation of fusion genes by RT-PCR. The image of full-length gels was presented without grouping of images by cropping gels.

**Supplementary Table S1.** List of genes detectable by CancerSCAN v1.1

**Supplementary Table S2.** List of primer sequences used for RT-PCR.

**Supplementary Table S3.** List of somatic changes detected by targeted exon sequencing.

**Supplementary Table S4.** List of gene expression profiles of ground-glass nodular lung adenocarcinoma.

**Supplementary Table S5.** List of differentially expressed genes between lung adenocarcinoma tissue and normal tissue.

**Supplementary Table S1.** List of genes detectable by CancerSCAN v1.1

| SNV, small Indel and CNV |        |       |        |         |
|--------------------------|--------|-------|--------|---------|
| ABL1                     | BRCA2  | FGFR2 | KIT    | PTCH1   |
| AKT1                     | CDH1   | FGFR3 | KRAS   | PTCH2   |
| AKT2                     | CDK4   | FLT3  | MDM2   | PTEN    |
| AKT3                     | CDK6   | GNA11 | MET    | PTPN11  |
| ALK                      | CDKN2A | GNAQ  | MLH1   | RB1     |
| APC                      | CSF1R  | GNAS  | MPL    | RET     |
| ARID1A                   | CTNNB1 | HNF1A | MTOR   | ROS1    |
| ARID1B                   | DDR2   | HRAS  | NF1    | SMAD4   |
| ARID2                    | EGFR   | IDH1  | NOTCH1 | SMARCB1 |
| ATM                      | EPHB4  | IDH2  | NPM1   | SMO     |
| ATRX                     | ERBB2  | IGF1R | NRAS   | SRC     |
| AURKA                    | ERBB3  | ITK   | NTRK1  | STK11   |
| AURKB                    | ERBB4  | JAK1  | PDGFRA | SYK     |
| BCL2                     | EZH2   | JAK2  | PDGFRB | TOP1    |
| BRAF                     | FBXW7  | JAK3  | PIK3CA | TP53    |
| BRCA1                    | FGFR1  | KDR   | PIK3R1 | VHL     |
| Translocation            |        |       |        |         |
| ALK                      | EWSR1  | ROS1  | RET    | TMPRSS2 |
|                          |        | TERT  |        |         |

CancerSCAN targets somatic mutations of 80 genes all exon (SNV, small Indel and CNV) and 5 genes translocation. The target size is 366.231 Kb.

SNV, single nucleotide variant; CNV, copy number variant.

**Supplementary Table S2.** List of PCR primer sequences used for RT-PCR

| GGN  | Gene           | Primer No. | Sequence (5'-3')          |                           | product size, bp | Annealing Temp, °C |
|------|----------------|------------|---------------------------|---------------------------|------------------|--------------------|
|      |                |            | Forward primer            | Reverse primer            |                  |                    |
| GGN3 | MED13L → TDRD3 | 1          | GCACCAGAGGA<br>GCTAAAGCA  | GATCGTAGGTG<br>CCTTCTTCC  | 154              | 57                 |
|      |                | 2          | AAAGGAACTCC<br>CAAGCGACT  | CGGAGCTGATA<br>CTGCCACAT  | 213              | 57                 |
| GGN4 | SAMD12 → TAF2  | 3          | GAAGCTGAGAC<br>GGCTAAGGA  | CGGAGCTGATA<br>CTGCCACAT  | 186              | 57                 |
|      |                | 4          | GGAGGCGACAC<br>TCTCAGGTA  | CCACCCTTGGA<br>TGTAGCAAT  | 196              | 57                 |
| GGN8 | CEP350 → TOP2A | 4          | GGAGGCGACAC<br>TCTCAGGTA  | CCACCCTTGGA<br>TGTAGCAAT  | 196              | 57                 |
|      | TADA2A → MMP9  | 5          | CTCGAGCAGAT<br>TTCATTGAGG | GCCCTCAAAGG<br>TTTGGAAATC | 218              | 57                 |
| GGN9 | TMEM243→DMTF1  | 6          | TGCAGTCATGG<br>TCACTTCAA  | TAAGTGGCTTG<br>GGGAAAGTG  | 152              | 57                 |
|      |                | 7          | TGCAGTCATGG<br>TCACTTCAA  | CAGTCGTGGAC<br>CTGAGACCT  | 196              | 57                 |

GGN, ground glass nodule; Temp, temperature; No., number; PCR, polymerase chain reaction; RT-PCR, reverse transcription-polymerase chain reaction.

**Supplementary Figure S1.** The proportions of solid and pure ground-glass opacity in GGN7. The proportions of solid and pure ground-glass opacity were determined using the tumor-shadow disappearance ratio on a computed tomography scan.

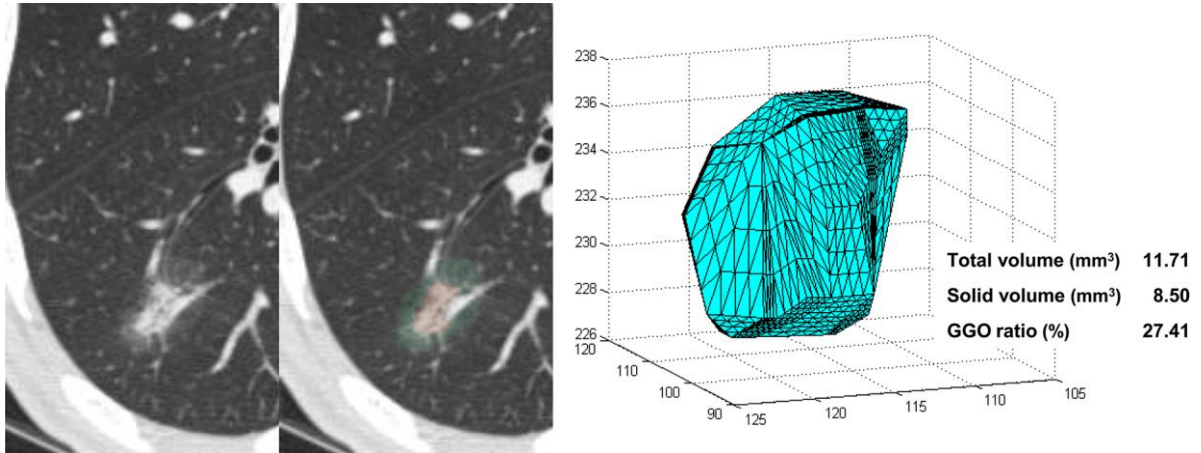

**Supplementary Figure S2.** The IGV visualization of fusion genes detected by RNA sequencing.

(a) MED13L → TDRD3 in GGN3, (b) SAMD12 → TAF2 in GGN4, (c) CEP350 → TOP2A and (d) TADA2A → MMP9 in GGN8, and (e) TMEM243 → DMTF1 in GGN9

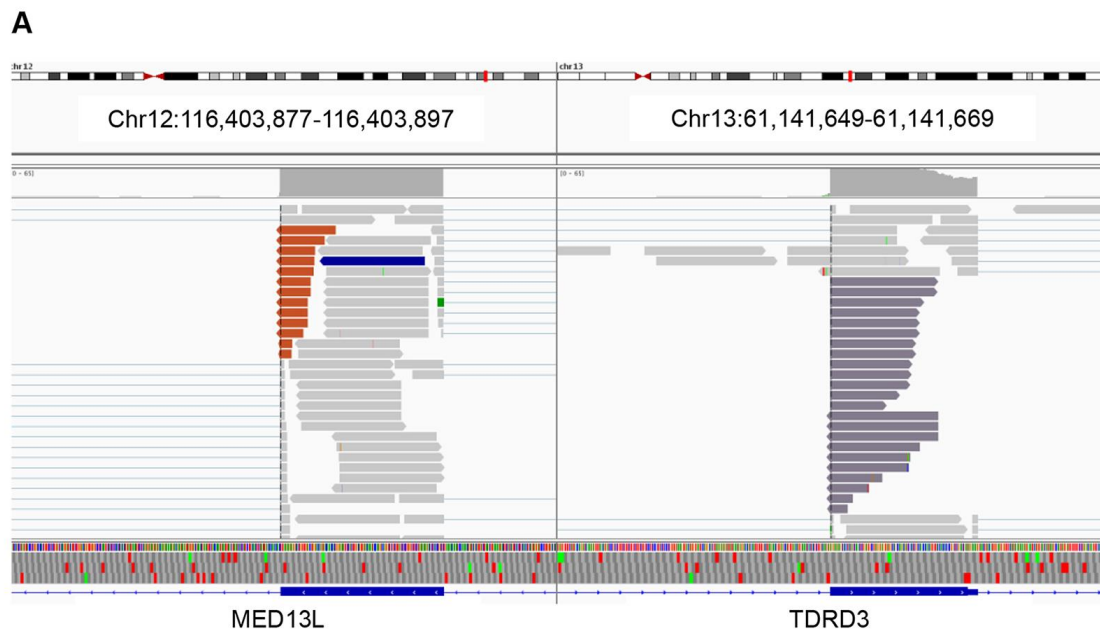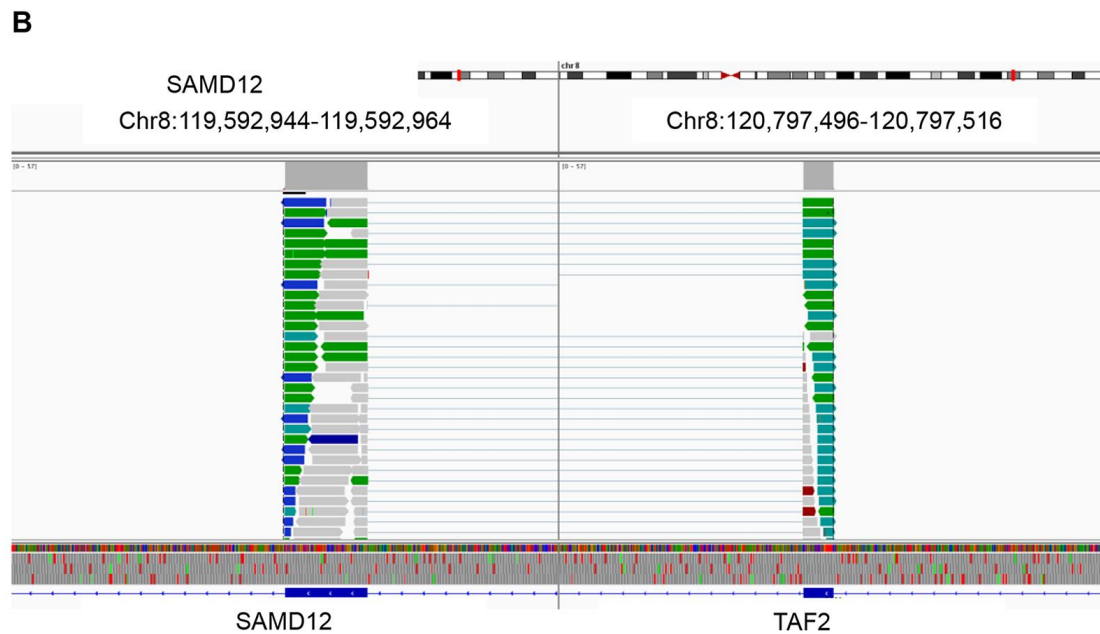

C

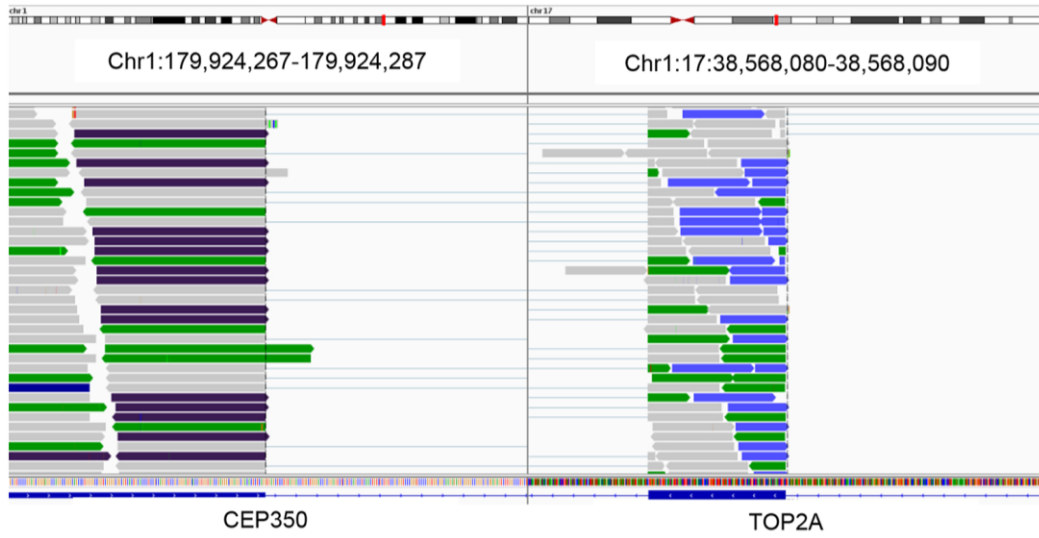

D

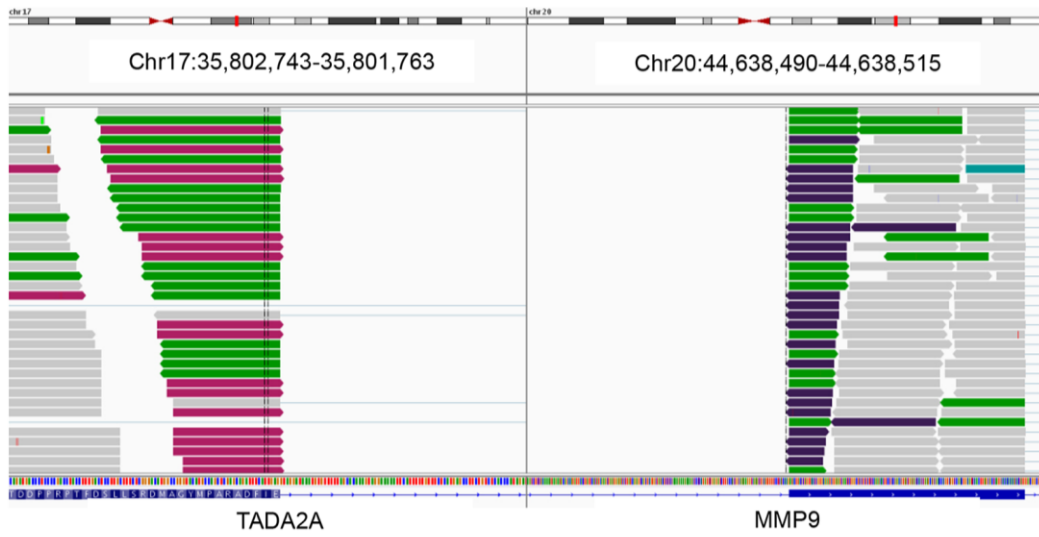

E

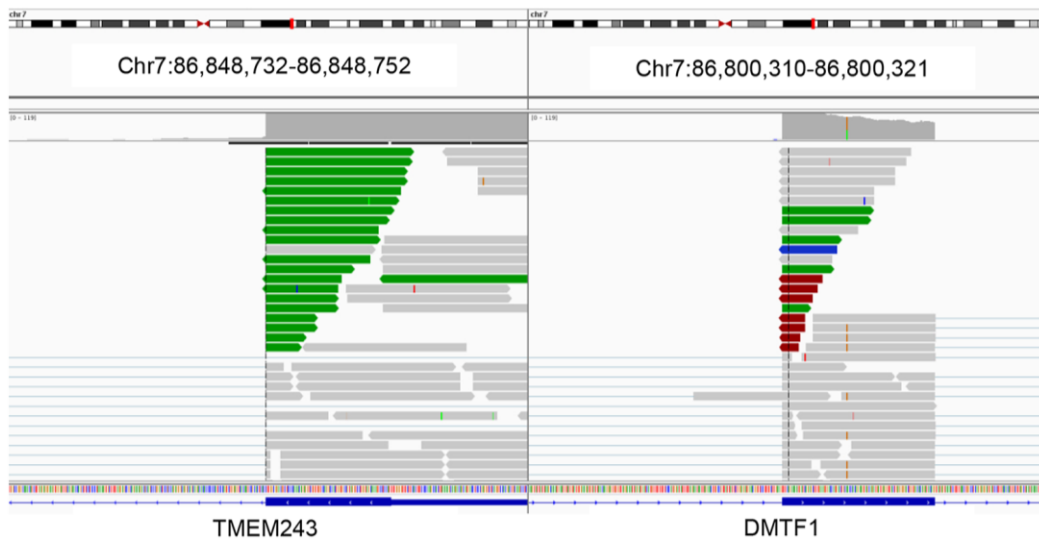

**Supplementary Figure S3.** Validation of fusion genes by RT-PCR. The image of full-length gels was presented without grouping of images by cropping gels.

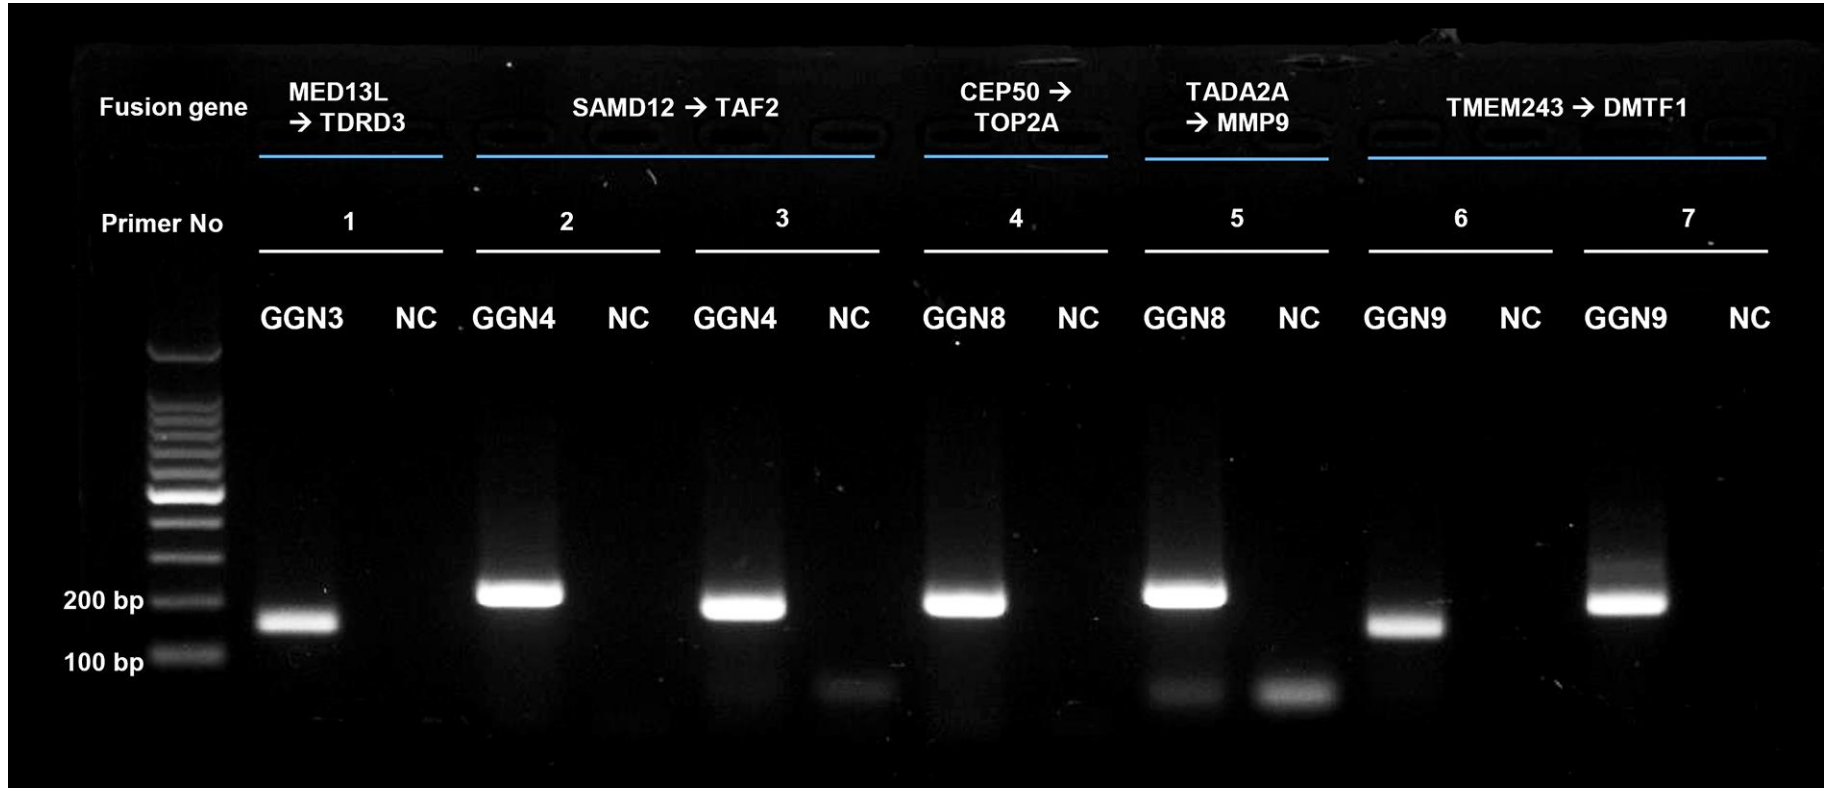

Supplement: 41598_2018_25800_MOESM1_ESM.pdf [file 41598_2018_25800_MOESM1_ESM.pdf]
